# Supplementary material
Source: PubMed Central journal article supplement (PMC3408751)
Supplement: JCI63689sd.pdf [file JCI63689sd.pdf]

## **Supplemental Information**

### **Memory CD4<sup>+</sup>T-cells protect against influenza through multiple synergizing mechanisms**

K. Kai McKinstry, Tara M. Strutt, Yi Kuang, Deborah M. Brown,  
Stewart Sell, Richard W. Dutton, and Susan L. Swain

**Supplemental Table I:** Viral escape mutants emerge in the absence of host CD8<sup>+</sup> T cell and B cells

| Viral Isolate                    | Peptide Sequence <sup>a</sup>    |
|----------------------------------|----------------------------------|
| Native PR8 HA <sub>126-138</sub> | HNTNGVTAACSHE                    |
| Control PR8                      | HNTNGVTAACSHE                    |
| 3.1                              | HNTNGVTAAC <b>X</b> HE           |
| 4.1                              | HNTNGVTAAC <b>T</b> HE           |
| 8.1                              | HNTNGVTAAC <b>P</b> HE           |
| 9.2                              | HNTNGVTA <b>T</b> CSHE           |
| 3.2                              | HNT <b>S</b> GVTAACSHE           |
| 9.2                              | HNTNGVTA <b>S</b> CSHE           |
| 11.2                             | HNT <b>K</b> GVTAACSHE           |
| 12.2                             | HNTNGVTA <b>A</b> SHE            |
| 13.2                             | HNTNG <b>G</b> TAACSHE           |
| 15.2                             | HNT <b>I</b> NGVT <b>C</b> ACSHE |
| 4.3 <sup>b</sup>                 | HNTNGVTAAC <b>P</b> HE           |
| Native OVA <sub>323-339</sub>    | ISQAVHAAHAEINEAGR                |
| Control PR8-OVA <sub>II</sub>    | ISQAVHAAHAEINEAGR                |
| 1.1                              | ISQAVHA <b>T</b> HAEINEAGR       |
| 2.1                              | ISQ-----GR                       |
| 3.1                              | ISQAVHA <b>T</b> HAEINEAGR       |
| 4.1                              | ISQAVHAAHAEINE <b>T</b> GR       |

<sup>a</sup> Nucleotide mutations and their corresponding translated aa location are underlined. Aa mutations are in bold blue text, a deletion is demarked as a dash (-), one silent mutation is simply underlined, and one unresolved aa is demarked as x.

<sup>b</sup> Mutant viral isolate obtained from recipient of *Prf1*<sup>-/-</sup> HNT CD4 T cells.

**Supplemental Table II:** Viral escape mutants emerge in *Rag*<sup>-/-</sup> recipients of T<sub>H</sub>1-polarized memory OT-II CD4<sup>+</sup> TCR Tg cells challenged with PR8-OVA<sub>II</sub> virus

| Viral Isolate                 | Peptide Sequence <sup>a</sup>                            |
|-------------------------------|----------------------------------------------------------|
| Native OVA <sub>323-339</sub> | ISQAVHAAHAEINEAGR                                        |
| Control PR8-OVA <sub>II</sub> | ISQAVHAAHAEINEAGR                                        |
| 1.1                           | ISQAVHAA <u>H</u> <b>E</b> EINEAGR                       |
| 2.1                           | ISQAVHAA <b>TI</b> EINEAGR                               |
| 3.1                           | ISQAVHAAHAEINE <u>T</u> GR                               |
| 4.1                           | ISQAVHAAHAEINE <u>T</u> GR                               |
| 5.1                           | ISQAVHAAHAEINE <u>T</u> GR                               |
| 6.1                           | I <u>Y</u> QAVHAA <u>T</u> H <sub>-</sub> EINEAGR        |
| 7.1                           | ISQAVHAAHAE <u>T</u> INEAGR                              |
| 8.1                           | ISQAVHAAHAEINE <u>T</u> GR                               |
| 9.1                           | ISQAVHAAHAE <b>F</b> INEAGR                              |
| 10.1                          | I <sub>-</sub> Q <sub>-</sub> VHAAHAE <sub>-</sub> NEAGR |

<sup>a</sup> Nucleotide mutations and their corresponding translated aa location are underlined. Aa mutations are in bold blue text, a deletion is demarked as a dash (-). No mutations were detection in the HNT peptide aa sequence (HA<sub>126-139</sub>) in any isolates.

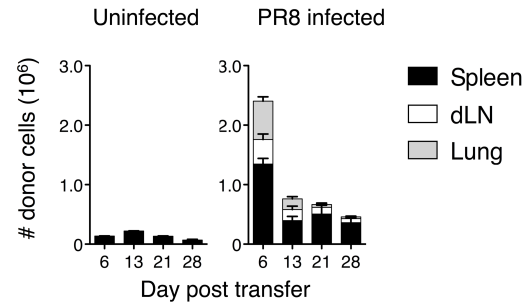

**Supplemental Figure 1:** Number of HNT cells present post PR8 priming.  $1 \times 10^6$  naive HNT cells were transferred to Thy-disparate WT hosts. Mice were either left uninfected (left panel) or challenged with 1,000 EID<sub>50</sub> PR8 (right panel). On stated days post-infection, the absolute number of donor cells present in the spleen, draining mediastinal lymph nodes (dLN), and lung were determined from groups of 3 mice/day.

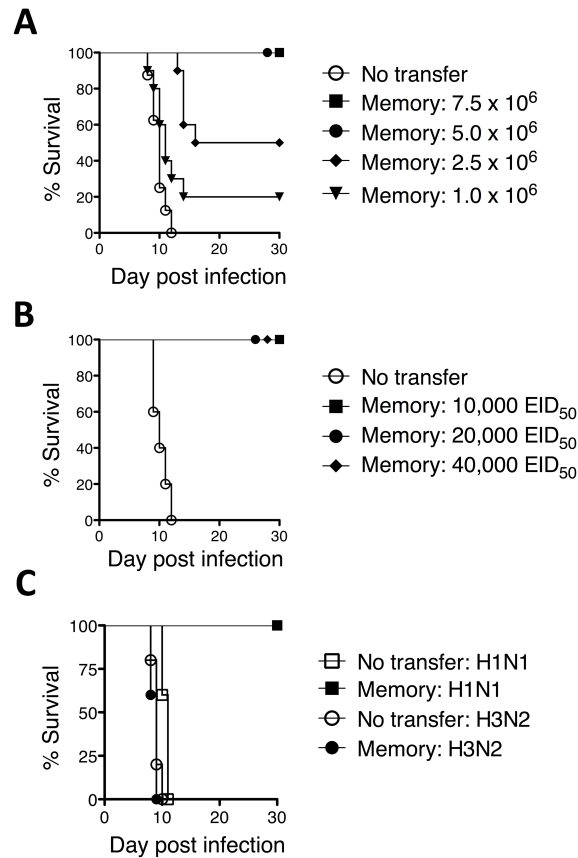

**Supplemental Figure 2:** Protective impact of memory CD4<sup>+</sup> T cells against lethal viral doses is dependent on cell number and is antigen-specific. **(A)** Stated numbers of T<sub>H</sub>1-polarized *in vitro*-generated memory HNT cells were transferred to WT hosts then infected with 10,000 EID<sub>50</sub> PR8. Survival from groups of at least 5 mice is shown. **(B)** WT mice received  $5 \times 10^6$  memory HNT cells and were challenged with stated doses of PR8 or **(C)** infected with a lethal dose of either PR8 (H1N1) or A/Philippines/2/82/x-79 (H3N2). Survival compared to mice not receiving memory HNT cells is shown (n=5/group). These results are representative of 3 separate independent experiments.

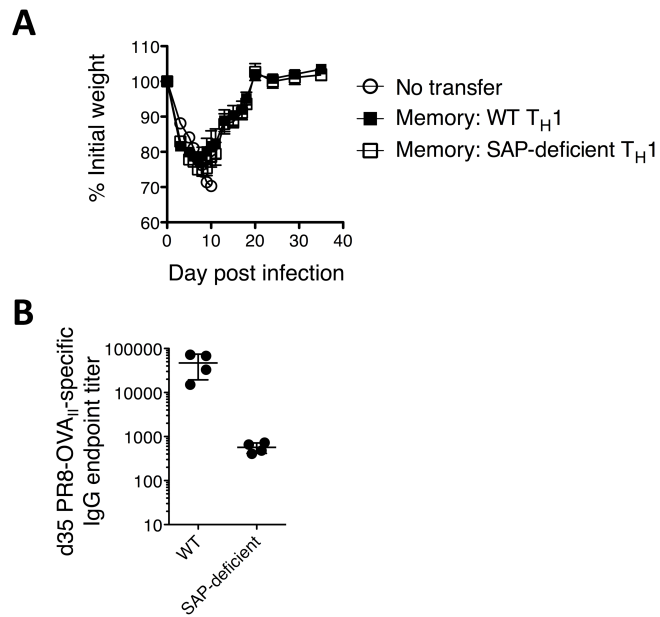

**Supplemental Figure 3:** Memory CD4<sup>+</sup> T cell synergy with B cells is independent of SAP-dependent helper functions. C57BL/6 nude mice received 5x10<sup>6</sup> WT or SAP-deficient OT-II memory cells and were challenged with a lethal dose of either PR8-OVA<sub>II</sub>. **(a)** Weight loss, n=5/group and **(b)** mean PR8-OVA<sub>II</sub>-specific total IgG endpoint titers (horizontal bars) are shown (n=4/group (dots)). These results are representative of 2 separate independent experiments.

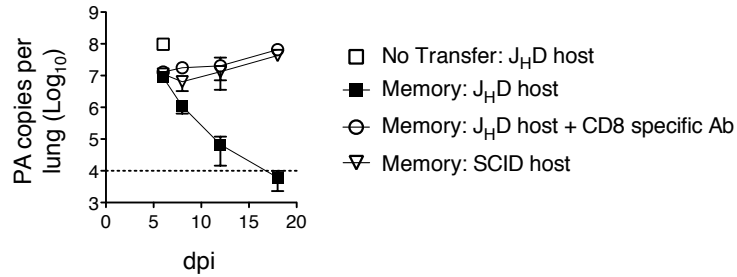

**Supplemental Figure 4:** Viral titers in different host mice receiving memory CD4<sup>+</sup> T cells.  $5 \times 10^6$  WT HNT memory cells were transferred to J<sub>H</sub>D mice, J<sub>H</sub>D mice depleted of CD8 T cells by Ab treatment as in Figure 5A and B (J<sub>H</sub>D host + CD8 specific Ab) or SCID mice. All mice were challenged with 2,500 EID<sub>50</sub> PR8 and viral titers determined on indicated days as described in Methods (n=3/group/day).

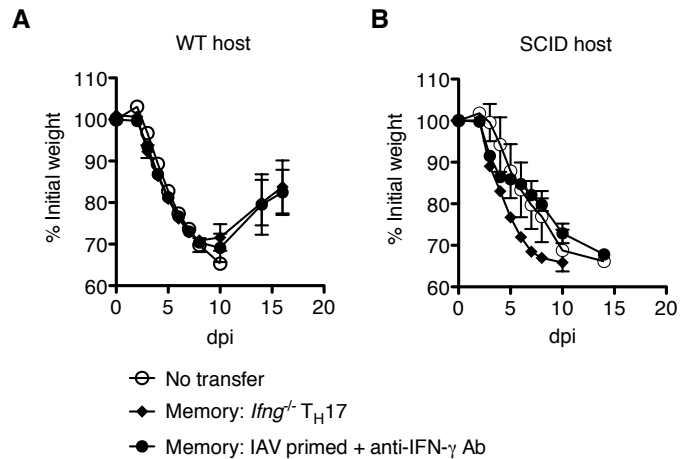

**Supplemental Figure 5:** T<sub>H</sub>17-polarized and IAV-primed memory CD4<sup>+</sup> T cells do not protect SCID mice in the absence of IFN-γ. 5x10<sup>6</sup> T<sub>H</sub>17-polarized memory HNT cells generated from *Ifng*<sup>-/-</sup> precursors or 5x10<sup>6</sup> IAV-primed WT memory HNT cells were transferred to **(A)** WT or **(B)** SCID hosts (4 mice/group). Control mice (No transfer) received no cells. Recipients of IAV primed memory cells also received anti-IFN-γ Ab throughout infection. WT hosts challenged with 10,000 EID<sub>50</sub> PR8 were fully protected by both memory populations until the experiment was terminated while both populations failed to protect SCID hosts challenged with 2,500 EID<sub>50</sub> PR8 (all mice succumbed by 15 dpi).
